# Supplementary material for: Structural details of a Class B GPCR-arrestin complex revealed by genetically encoded crosslinkers in living cells
Source: PubMed Central journal article supplement (PMC9977954; doi:10.1038/s41467-023-36797-2), 2023-03-01
Supplement: 41467_2023_36797_MOESM3_ESM.pdf [file 41467_2023_36797_MOESM3_ESM.pdf]

**File name: Supplementary Data 1**

**Description: Background signals in the PTH1R-arr2-complex.** Relative intensity of the background signal running at the height of the crosslinking band (Supplementary Fig. 8) as a fraction of the total arrestin signal (crosslinked + not crosslinked) was determined by densitometric analysis of at least three biological replicates of the  $\alpha$ HA western blots. P-value of the signal-to-noise ratio for each pair is given. Background signals of all positions with P-values < 0.02 (green highlight) were pooled and used as control group for the two-sided test (Welch's t-test) of each crosslinking pair (Supplementary Data 2).

**File name: Supplementary Data 2**

**Description: Crosslinking pairs in the PTH1R-arr2-complex.** Relative intensity of the crosslinking band as a fraction of the total arrestin signal (crosslinked + not crosslinked) as determined by densitometric analysis of at least three biological replicates of the  $\alpha$ -HA western blots. Standard deviation among all replicates is given in percent. P-value of the signal-to-noise ratio for each pair as well as the p-value for the two-sided test (Welch's t-test) of each pair against the background signal control.

**File name: Supplementary Data 3**

**Description: Plot of Distances against Crosslinking Yield in Fig 3a**

**File name: Supplementary Data 4**

**Description: Distribution of distances in Fig 5a**

**File name: Supplementary Data 5**

**Description: Distribution of distances in Fig 5b**

**File name: Supplementary Data 6**

**Description: Distribution of distances in Fig 5c**

**File name: Supplementary Data 7**

**Description: Orientation of Arrestin in Fig 5d, 5e and 5f**
